# Supplementary material for: Towards long-read metagenomics: complete assembly of three novel genomes from bacteria dependent on a diazotrophic cyanobacterium in a freshwater lake co-culture
Source: PubMed Central journal article supplement (PMC5248499; doi:10.1186/s40793-017-0224-8), 2017-01-19

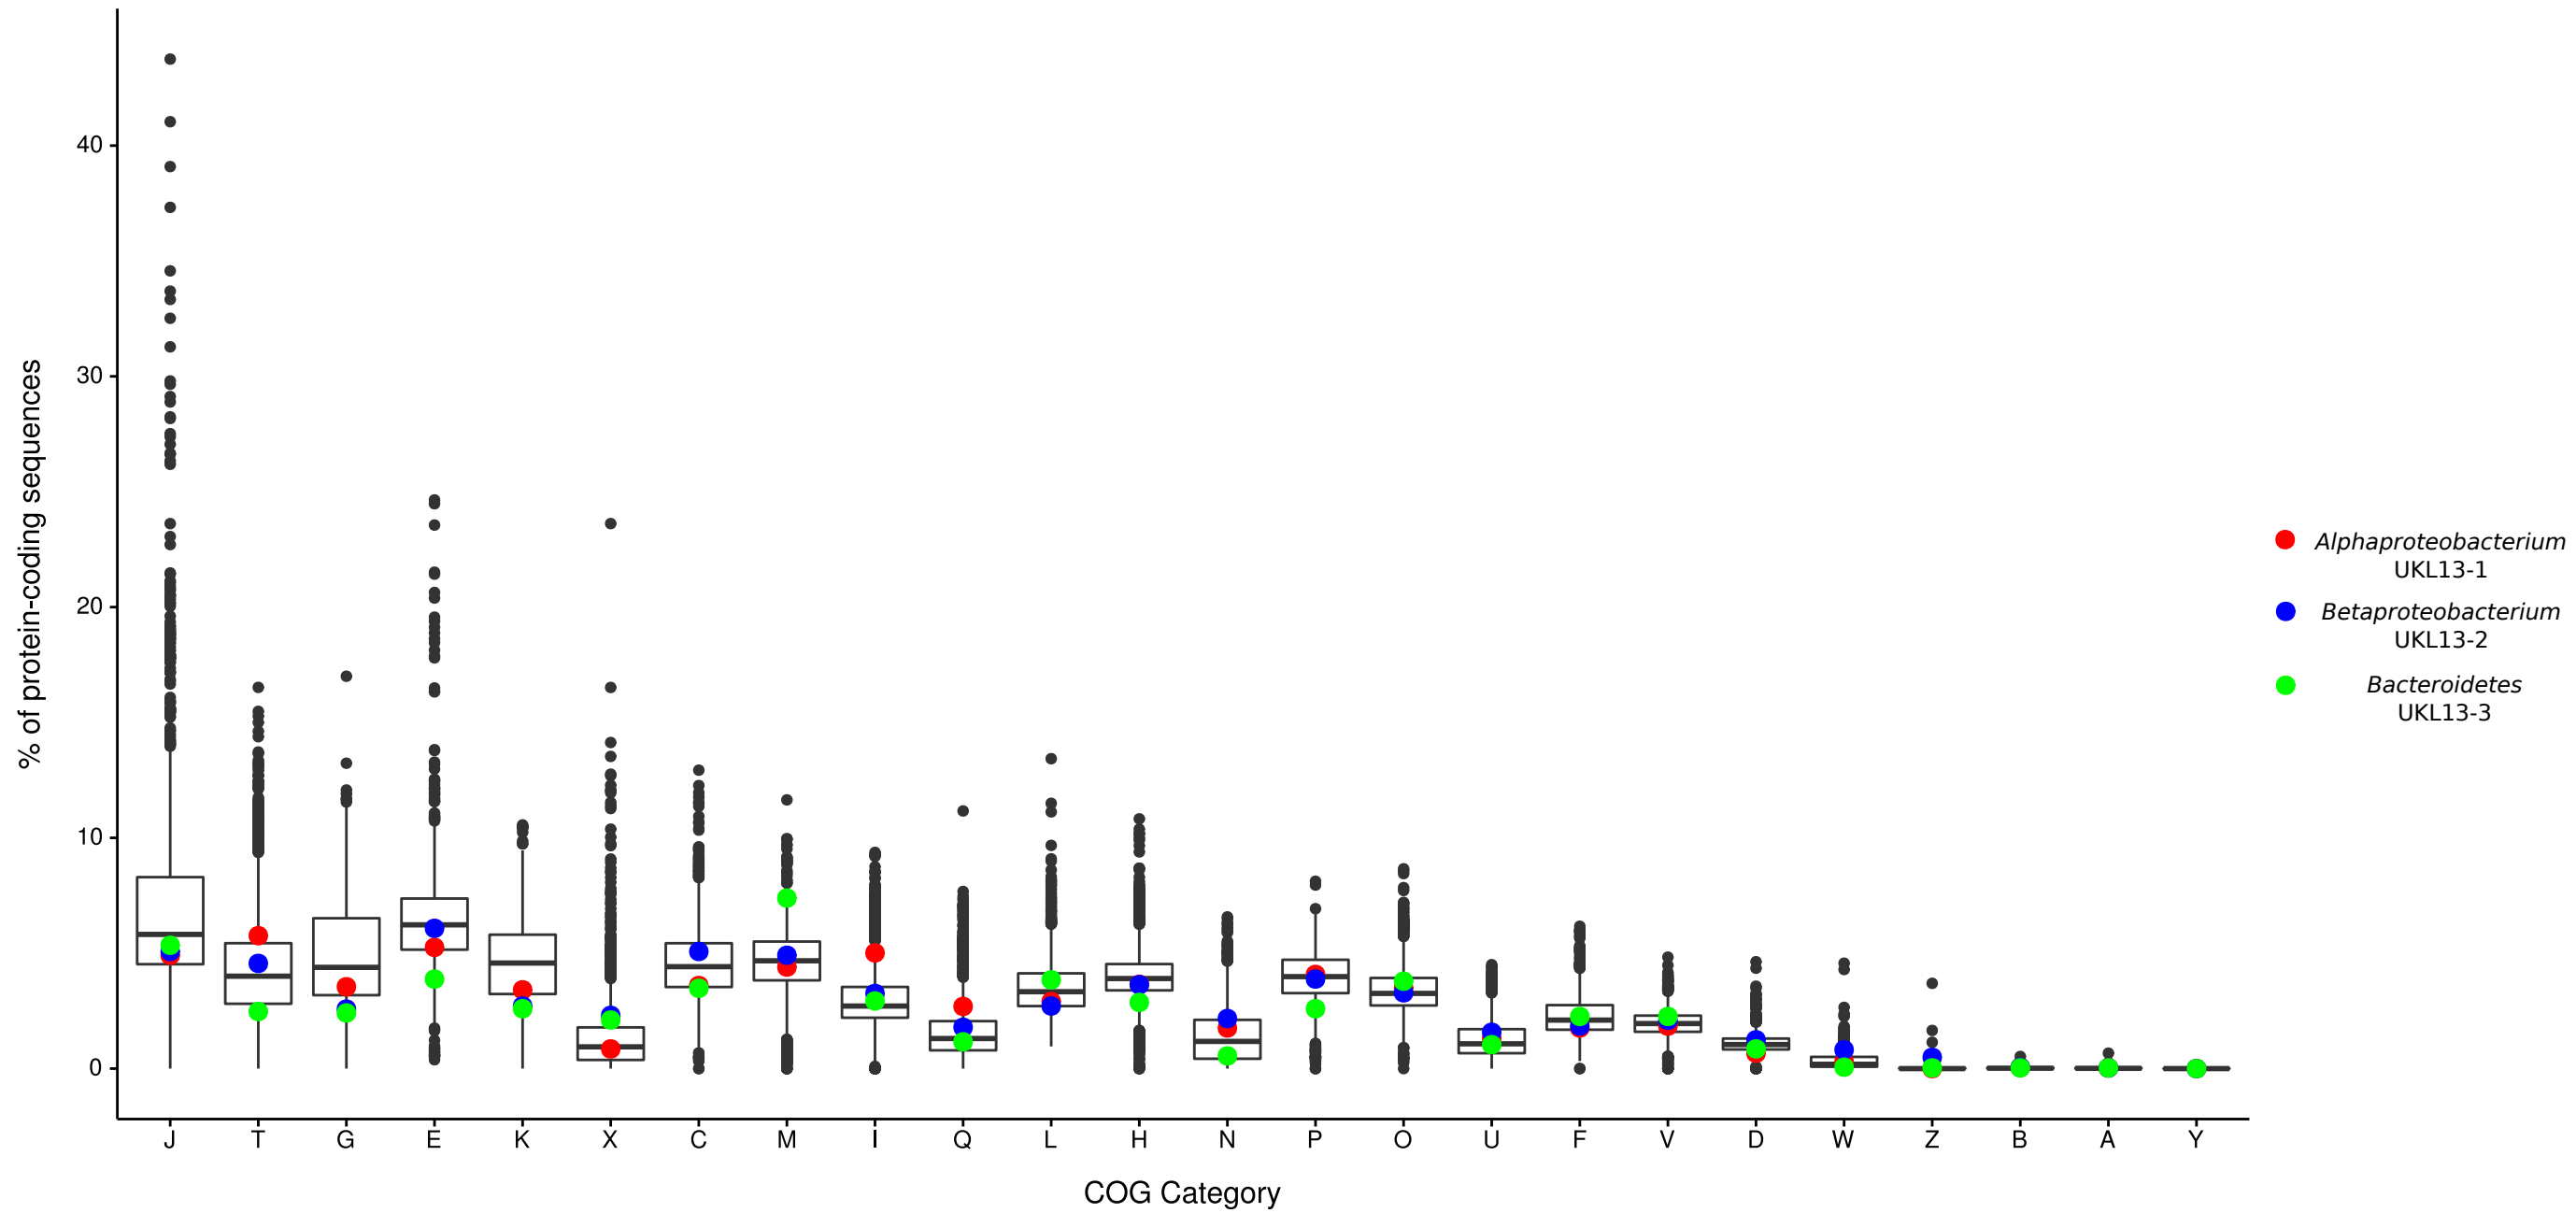

Supplement: 40793_2017_224_MOESM7_ESM.pdf [file 40793_2017_224_MOESM7_ESM.pdf]
